# Supplementary material for: How many general and inflammatory variables need to be fulfilled when defining sepsis due to the 2003 SCCM/ESICM/ACCP/ATS/SIS definitions in critically ill surgical patients: a retrospective observational study
Source: Springer Nature journal article supplement (doi:10.1186/1471-2253-10-22), 2010-12-01

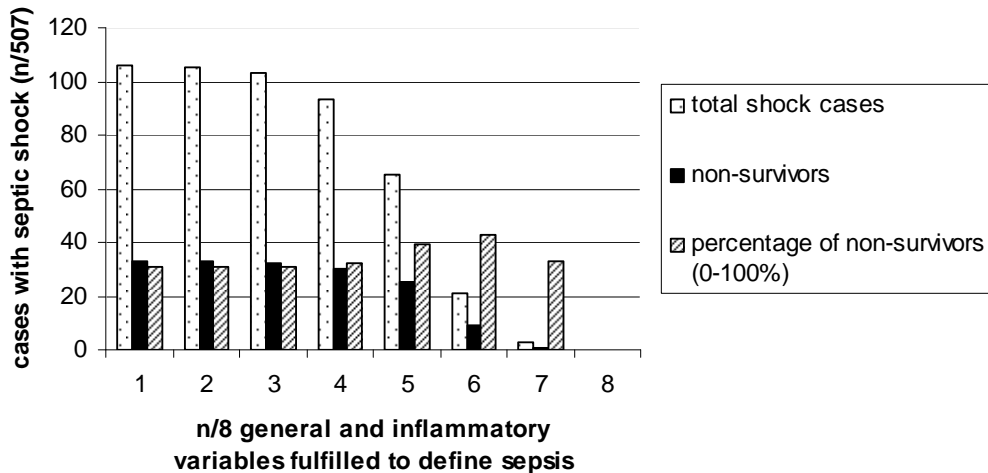

Supplement: 12871_2009_93_MOESM1_ESM.pdf [file 12871_2009_93_MOESM1_ESM.pdf]
